# Supplementary material for: Mapping Prospects for Artificial Groundwater Recharge Utilizing Remote Sensing and GIS Methods
Source: MDPI journal article supplement (doi:10.3390/w15223904), 2023-11-08
Supplement: s1 [file s1]

*Supplementary Figures*

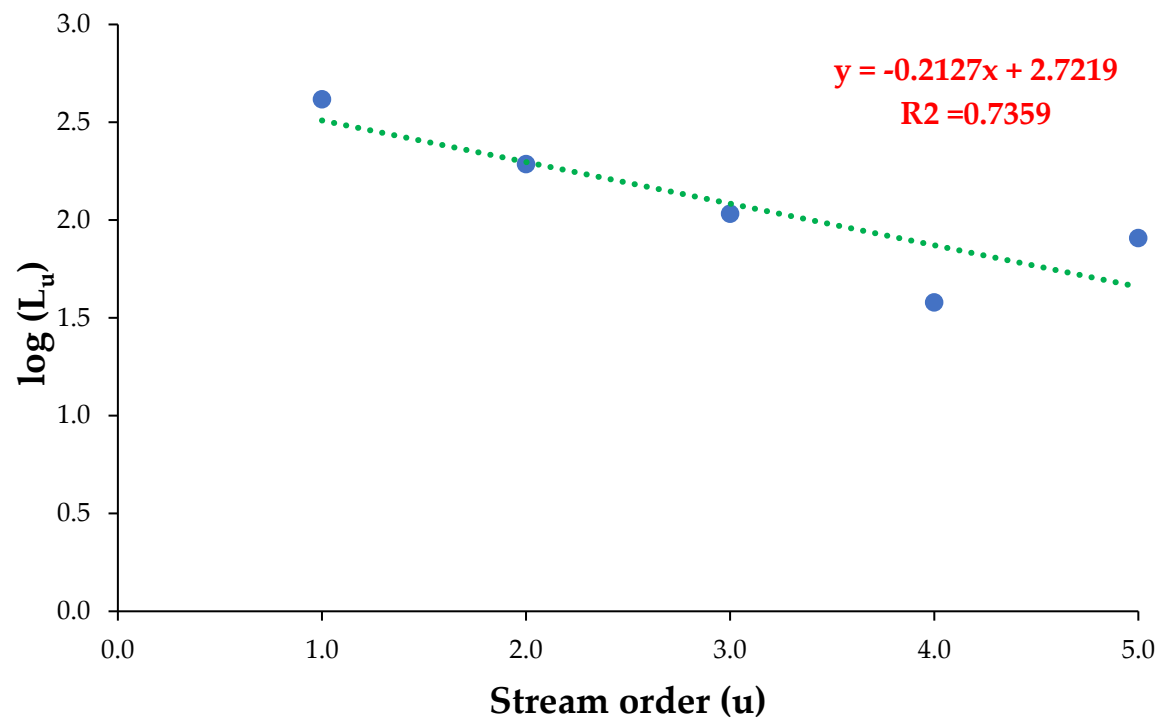

**Figure S1.** Scatter plot for normalized stream length ratio computation in the Nandhour-Kalish River watershed.

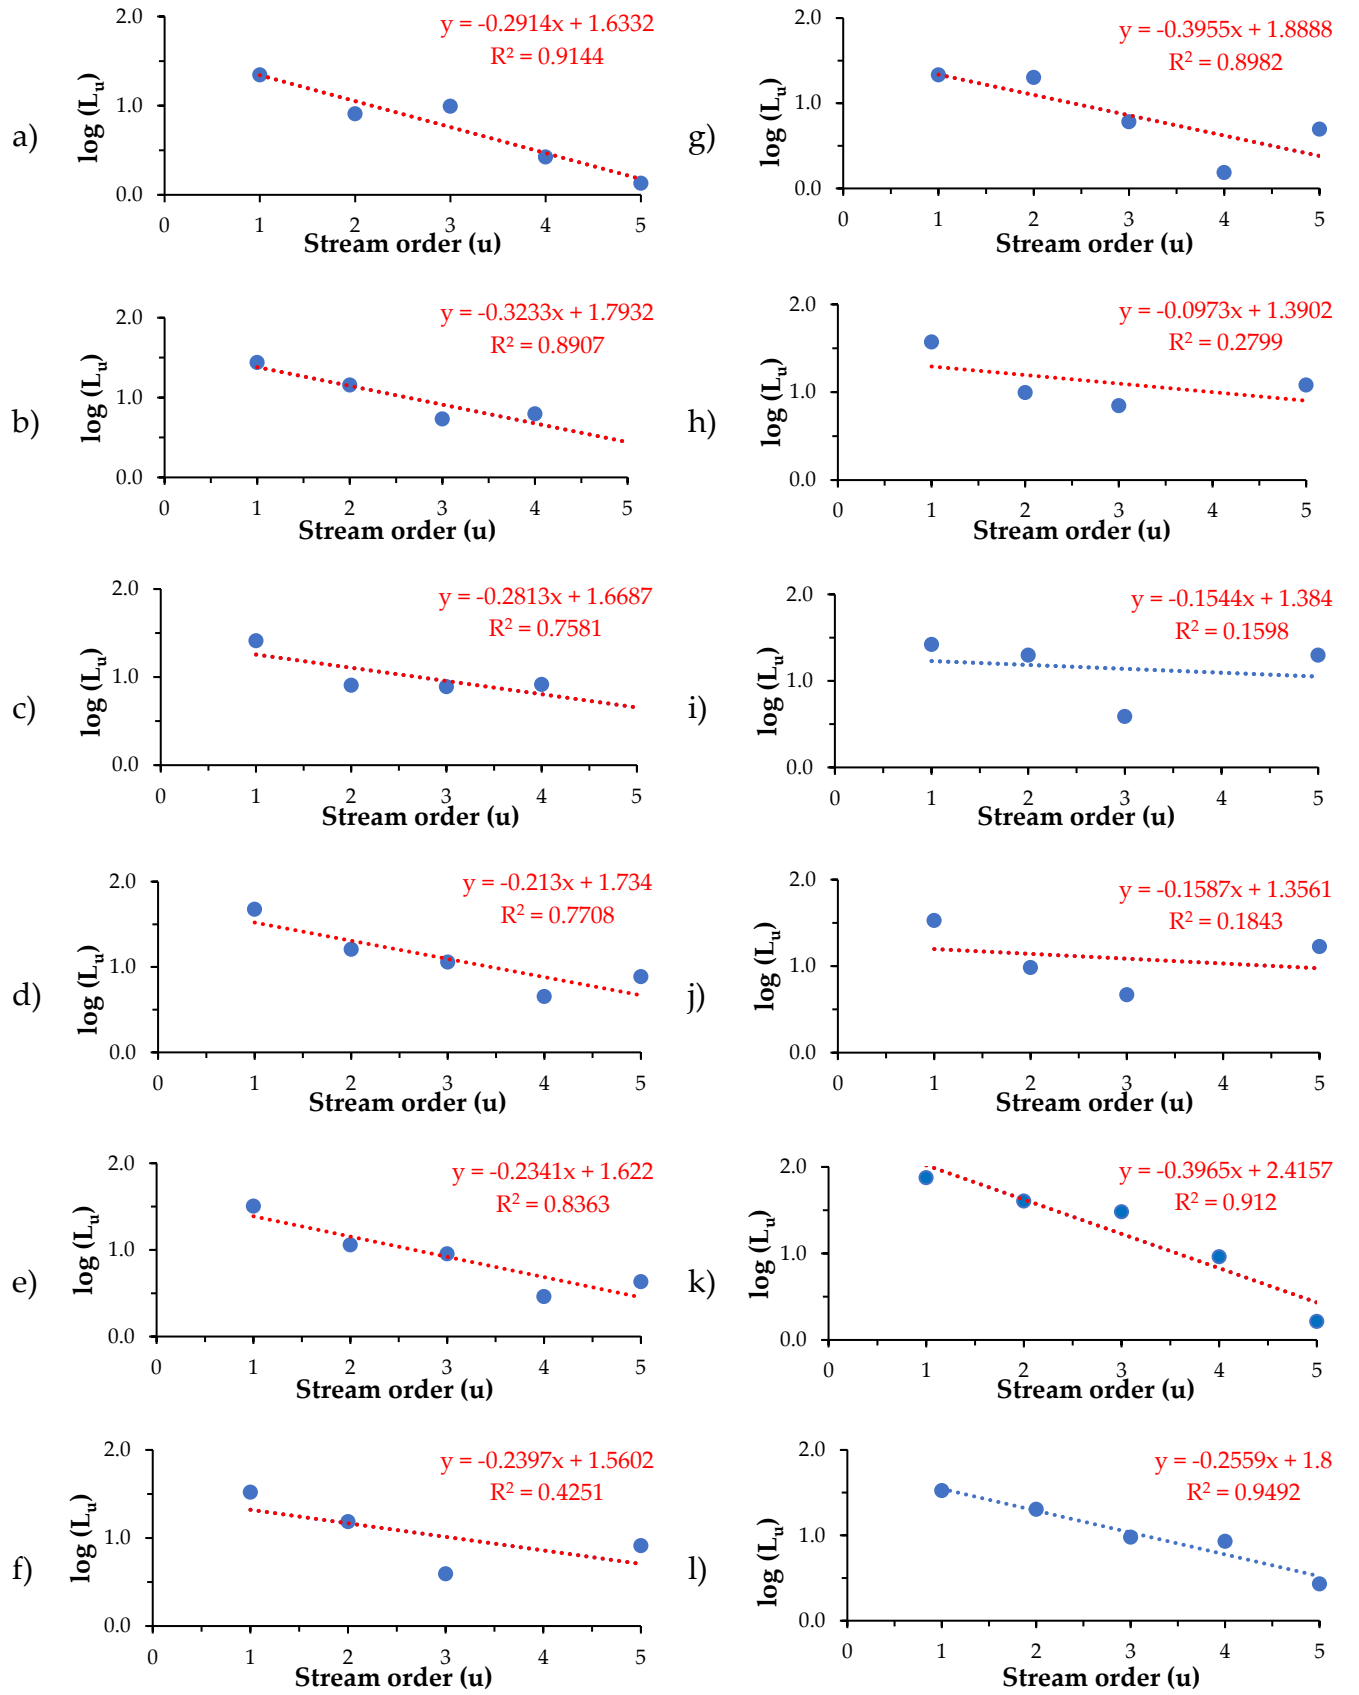

**Figure S2.** Scatter plot for normalized stream length ratio computation in the sub-watershed (a) to (l) SWS1-SWS-12, respectively.

*Appendix B*

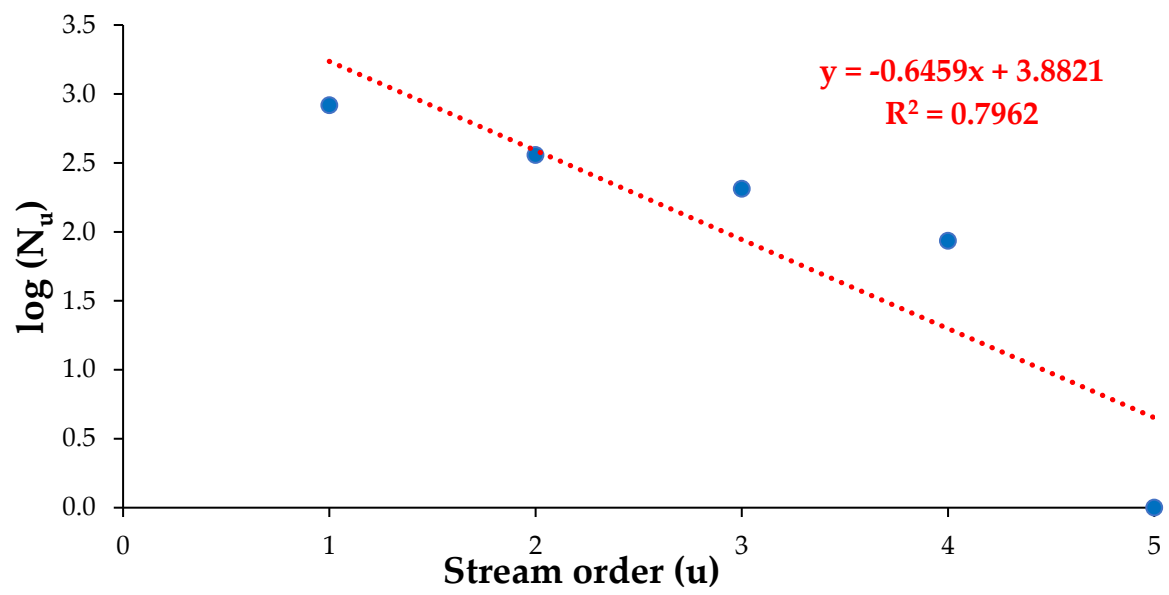

**Figure S3.** Scatter plot for computation of normalized bifurcation ratio in Nandhour-Kalish River watershed.

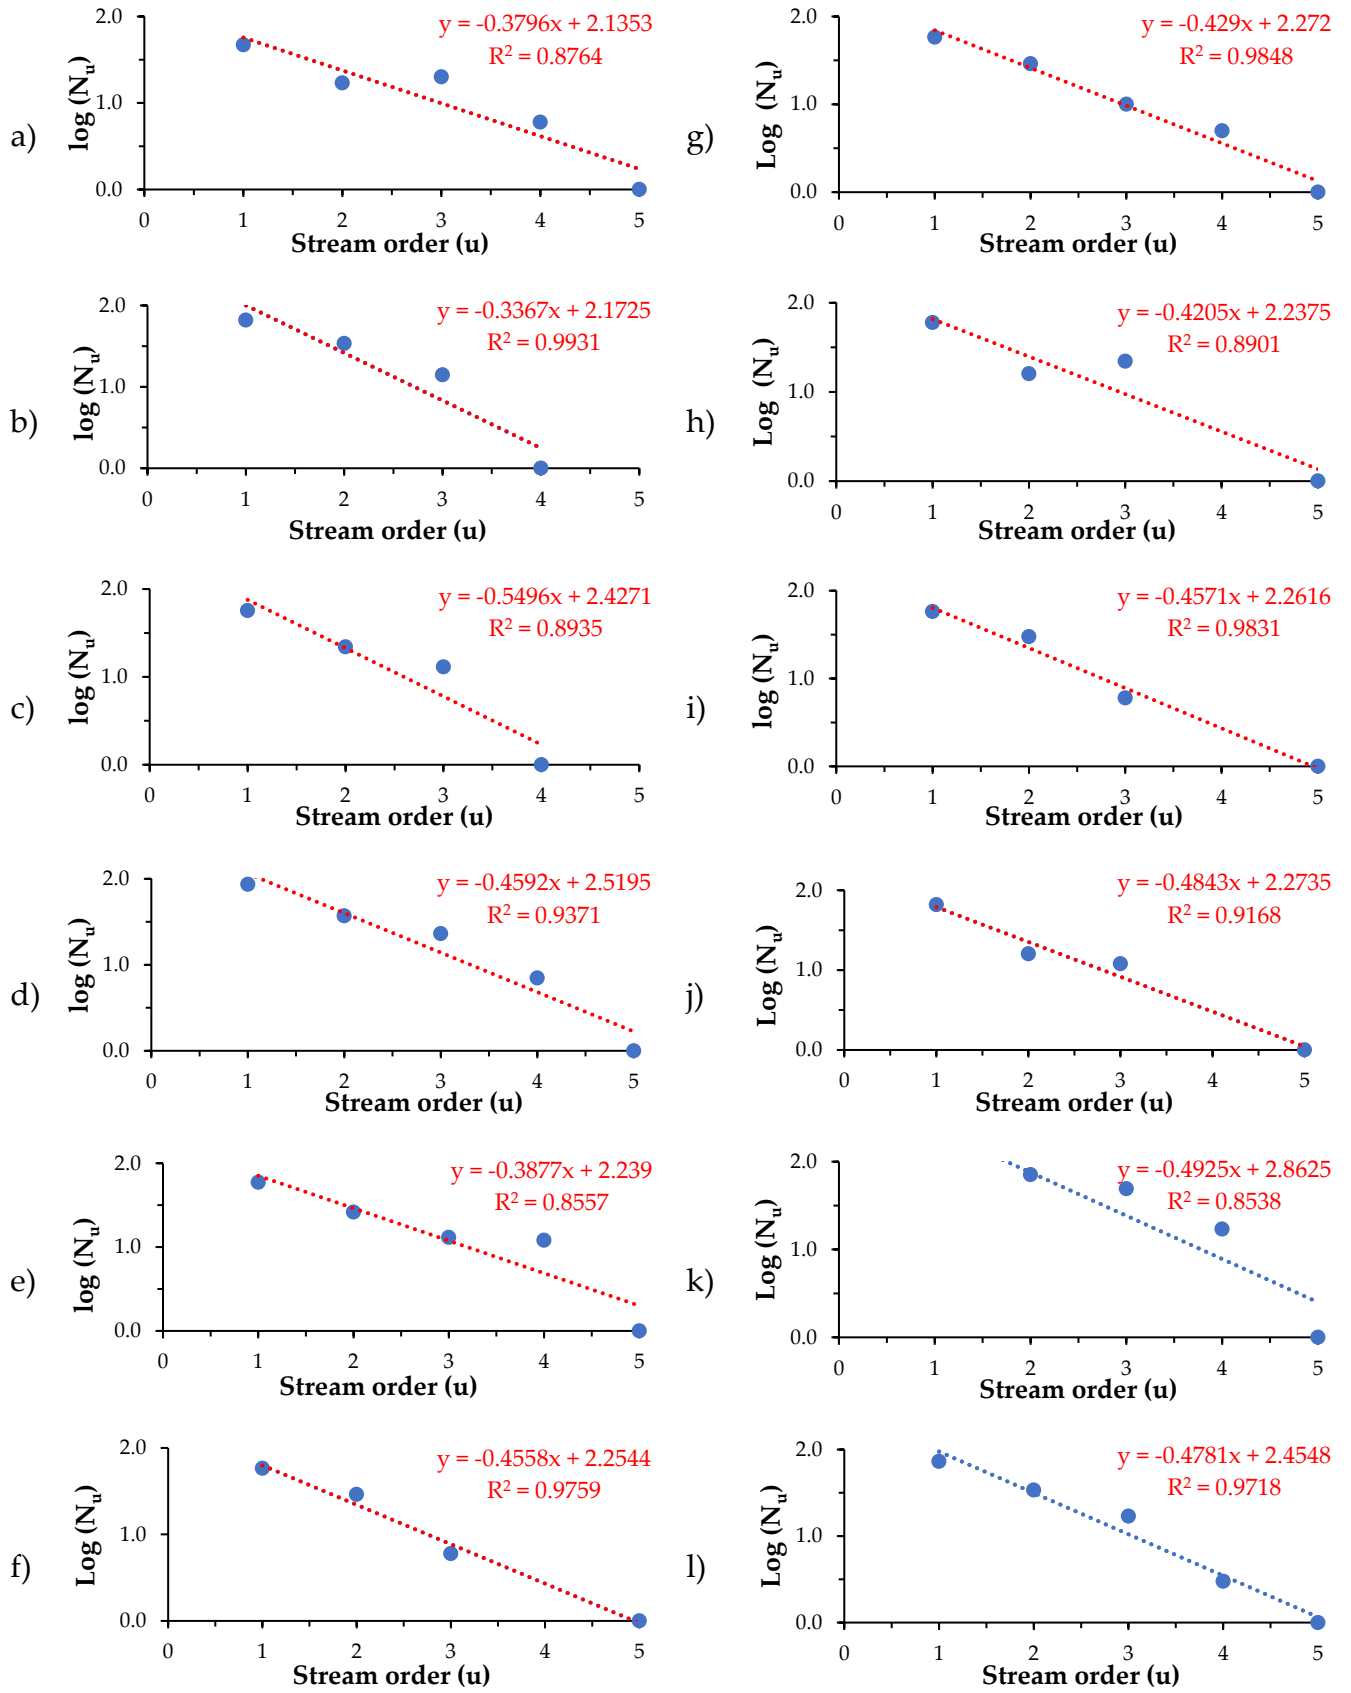

**Figure S4.** Scatter plot for computation of normalized bifurcation ratio in sub-watershed (a) to (l) SWS1-SWS-12, respectively.

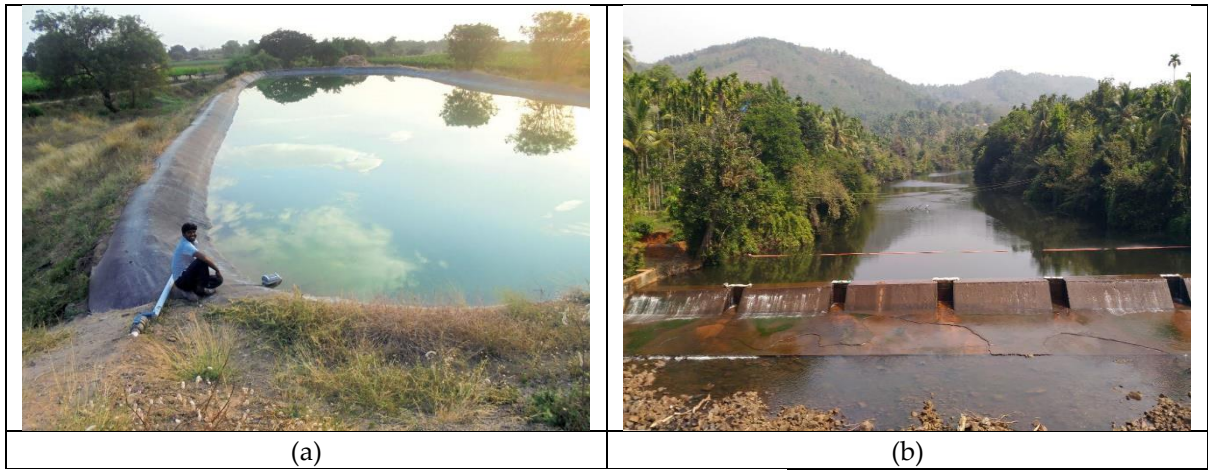

**Figure S5.** A basic structure of (a) farm ponds and (b) check dams.

### *Supplementary Tables*

**Table S1.** Details of various datasets used for developing thematic maps in the study.

| S. No. | Type of data                     | Details of data                                                       | Source of data                                                                                                |
|--------|----------------------------------|-----------------------------------------------------------------------|---------------------------------------------------------------------------------------------------------------|
| 1      | Toposheet                        | 53O11, 53O12, 53O15, 53O16, 53P9,<br>53P13<br>On a scale of 1: 50,000 | Survey of India (SOI), Dehradun,<br>Uttarakhand                                                               |
| 2      | DEM (Digital<br>Elevation Model) | ASTER DEM data (12.5m x 12.5m<br>resolution)                          | Alaska Satellite Facility (ASF)                                                                               |
| 3      | Soil                             | Northern India (Plate 199)                                            | National Atlas & Thematic Mapping<br>Organization, Department of Science &<br>Technology, Government of India |
| 4      | Land use and<br>land cover       | Copernicus Global Land Cover<br>Layers (2020)                         | United Nations (UN) and Food and<br>Agriculture Organization (FAO)                                            |

**Table S2.** Drainage density categorization.

| Drainage density (Km/Km <sup>2</sup> ) | Drainage texture |
|----------------------------------------|------------------|
| Less than 2                            | Very coarse      |
| 2 to 4                                 | Coarse           |
| 4 to 6                                 | Moderate         |
| 6 to 8                                 | Fine             |
| Greater than 8                         | Very fine        |

**Table S3.** Categorization of the length of overland flow.

| Value         | Length of overland flow |
|---------------|-------------------------|
| Less than 0.2 | Low                     |

|               |        |
|---------------|--------|
| 0.2 to 0.3    | Medium |
| More than 0.3 | High   |

**Table S4.** Basin shape classification based on elongation ratio.

| Elongation ratio | Shape of basin |
|------------------|----------------|
| Less than 0.7    | Elongated      |
| 0.7 to 0.8       | Less elongated |
| 0.8 to 0.9       | Oval           |
| Greater than 0.9 | Circular       |

**Table S5.** Watershed Classification based on HI.

| HI value                 | Watershed development stage      |
|--------------------------|----------------------------------|
| Greater or equal to 0.60 | Youthful or In-equilibrium stage |
| 0.60 to 0.35             | Equilibrium or Mature stage      |
| Less than 0.35           | Monadnock or Old stage           |

**Table S6.** Recommended potential locations of water conservation structures.

| Structure(s) | Slope (%)    | Runoff potential | Stream order                       | Catchment area (ha) | Soil type       |
|--------------|--------------|------------------|------------------------------------|---------------------|-----------------|
| Farm pond    | 0 to 5       | Moderate/High    | 1 <sup>st</sup>                    | 1 to 2              | Sandy clay loam |
| Check dam    | Less than 15 | Moderate/High    | 1 <sup>st</sup> to 4 <sup>th</sup> | Greater than 25     | Sandy clay loam |

**Table S7.** The area, perimeter, and basin length of the Nandhour-Kailash River watershed and sub-watersheds.

| Sub watersheds (Name) | Area (Km <sup>2</sup> ) | Perimeter (Km) | Basin length (L, Km) |
|-----------------------|-------------------------|----------------|----------------------|
| SWS1 (Aligad)         | 29.092                  | 31.05          | 8.899                |
| SWS2 (Kundal)         | 36.809                  | 41.45          | 10.171               |

|                          |         |        |        |
|--------------------------|---------|--------|--------|
| SWS3 (Lowarnala North)   | 31.193  | 42.52  | 9.258  |
| SWS4 (Lobchla West)      | 54.529  | 52.85  | 12.715 |
| SWS5 (Deotar)            | 35.719  | 37.57  | 9.999  |
| SWS6 (Bhalseni)          | 38.332  | 38.95  | 10.408 |
| SWS7 (Uparla Gauniyarao) | 33.158  | 45.20  | 9.585  |
| SWS8 (Balot South)       | 34.900  | 52.17  | 9.860  |
| SWS9 (Nandhour)          | 32.662  | 65.52  | 9.504  |
| SWS10 (Nakoliy)          | 32.319  | 60.75  | 9.447  |
| SWS11 (Saraunj)          | 76.062  | 99.77  | 15.361 |
| SWS12 (Odra)             | 40.408  | 52.12  | 10.725 |
| BASIN (Nandhour-Kalish)  | 474.094 | 276.20 | 43.433 |

**Table S8.** Linear aspects of Nandhour-Kailash River watershed and its sub-watersheds.

| Morphometric parameter      | Formula                         | Value          |
|-----------------------------|---------------------------------|----------------|
| Stream order (u)            | Hierarchical rank               | -              |
| Stream number ( $N_u$ )     | $N_u = N_1 + N_2 + N_3 + \dots$ | <b>1481</b>    |
| 1 <sup>st</sup> order       | $N_1$                           | 828            |
| 2 <sup>nd</sup> order       | $N_2$                           | 361            |
| 3 <sup>rd</sup> order       | $N_3$                           | 205            |
| 4 <sup>th</sup> order       | $N_4$                           | 86             |
| 5 <sup>th</sup> order       | $N_5$                           | 1              |
| Stream length ( $L_u$ , Km) | Length of Stream                | <b>833.059</b> |
| 1 <sup>st</sup> order       | $L_1$                           | 413.904        |
| 2 <sup>nd</sup> order       | $L_2$                           | 193.019        |
| 3 <sup>rd</sup> order       | $L_3$                           | 107.496        |
| 4 <sup>th</sup> order       | $L_4$                           | 37.855         |



|                                              |                       |                                |               |
|----------------------------------------------|-----------------------|--------------------------------|---------------|
|                                              | 5 <sup>th</sup> order | L <sub>5</sub>                 | 80.785        |
| Average stream length (L <sub>u</sub> ', Km) |                       | $L_u' = \frac{L_u}{N_u}$       | <b>16.556</b> |
|                                              | 1 <sup>st</sup> order | L <sub>1</sub> '               | 0.499         |
|                                              | 2 <sup>nd</sup> order | L <sub>2</sub> '               | 0.534         |
|                                              | 3 <sup>rd</sup> order | L <sub>3</sub> '               | 0.524         |
|                                              | 4 <sup>th</sup> order | L <sub>4</sub> '               | 0.440         |
|                                              | 5 <sup>th</sup> order | L <sub>5</sub> '               | 80.785        |
|                                              |                       | $R_L = \frac{L_u}{L(u-1)}$     | <b>0.612</b>  |
|                                              |                       | L <sub>2</sub> /L <sub>1</sub> | 0.466         |
| Stream length ratio (R <sub>L</sub> )        |                       | L <sub>3</sub> /L <sub>2</sub> | 0.556         |
|                                              |                       | L <sub>4</sub> /L <sub>3</sub> | 0.352         |
|                                              |                       | L <sub>5</sub> /L <sub>4</sub> | 2.134         |
|                                              |                       | $R_b = \frac{N_u}{N(u+1)}$     | <b>4.424</b>  |
|                                              |                       | N <sub>1</sub> /N <sub>2</sub> | 2.293         |
| Bifurcation ratio (R <sub>b</sub> )          |                       | N <sub>2</sub> /N <sub>3</sub> | 1.760         |
|                                              |                       | N <sub>3</sub> /N <sub>4</sub> | 2.383         |
|                                              |                       | N <sub>4</sub> /N <sub>5</sub> | 86.00         |
| Basin length (L, Km)                         |                       | $L = 1.312 \times A^{0.568}$   | <b>43.433</b> |

**Table S9.** Order-wise number of streams, stream length, and average stream length values of sub-watersheds for the Nandhour-Kailash River watershed.

1

| Sub<br>watersheds | No. of streams (N <sub>u</sub> ) |                 |                 |                 |                 |       | Stream length (L <sub>u</sub> , Km) |                 |                 |                 |                 |        | Average stream length (L <sub>u</sub> ', Km) |                 |                 |                 |                 |
|-------------------|----------------------------------|-----------------|-----------------|-----------------|-----------------|-------|-------------------------------------|-----------------|-----------------|-----------------|-----------------|--------|----------------------------------------------|-----------------|-----------------|-----------------|-----------------|
|                   | Order No.                        |                 |                 |                 |                 |       | Order No.                           |                 |                 |                 |                 |        | Order No.                                    |                 |                 |                 |                 |
|                   | 1 <sup>st</sup>                  | 2 <sup>nd</sup> | 3 <sup>rd</sup> | 4 <sup>th</sup> | 5 <sup>th</sup> | Total | 1 <sup>st</sup>                     | 2 <sup>nd</sup> | 3 <sup>rd</sup> | 4 <sup>th</sup> | 5 <sup>th</sup> | Total  | 1 <sup>st</sup>                              | 2 <sup>nd</sup> | 3 <sup>rd</sup> | 4 <sup>th</sup> | 5 <sup>th</sup> |
| SWS1              | 47                               | 17              | 20              | 6               | 1               | 91    | 22.055                              | 8.075           | 9.839           | 2.649           | 1.345           | 43.963 | 0.469                                        | 0.475           | 0.492           | 0.442           | 1.345           |
| SWS2              | 66                               | 34              | 14              | 1               | 0               | 115   | 27.335                              | 14.280          | 5.369           | 6.239           | 0.00            | 53.223 | 0.414                                        | 0.420           | 0.384           | 6.239           | -               |
| SWS3              | 57                               | 22              | 13              | 1               | 0               | 93    | 25.800                              | 8.057           | 7.758           | 8.248           | 0.00            | 49.868 | 0.453                                        | 0.366           | 0.597           | 8.248           | -               |
| SWS4              | 86                               | 37              | 23              | 7               | 1               | 154   | 47.254                              | 16.042          | 11.380          | 4.496           | 7.681           | 86.853 | 0.549                                        | 0.434           | 0.495           | 0.642           | 7.681           |
| SWS5              | 59                               | 26              | 13              | 12              | 1               | 111   | 31.804                              | 11.380          | 8.952           | 2.877           | 4.269           | 59.260 | 0.539                                        | 0.437           | 0.689           | 0.240           | 4.269           |
| SWS6              | 58                               | 29              | 6               | 0               | 1               | 94    | 32.975                              | 15.298          | 3.898           | 0.00            | 8.167           | 60.338 | 0.569                                        | 0.528           | 0.650           | -               | 8.167           |
| SWS7              | 58                               | 29              | 10              | 5               | 1               | 103   | 21.437                              | 20.002          | 6.057           | 1.534           | 4.955           | 53.985 | 0.370                                        | 0.690           | 0.606           | 0.307           | 4.955           |
| SWS8              | 60                               | 16              | 22              | 0               | 1               | 99    | 37.216                              | 9.860           | 7.003           | 0.00            | 12.039          | 66.118 | 0.620                                        | 0.616           | 0.318           | -               | 12.039          |
| SWS9              | 58                               | 30              | 6               | 0               | 1               | 95    | 26.335                              | 19.837          | 3.869           | 0.00            | 19.837          | 69.898 | 0.454                                        | 0.661           | 0.645           | -               | 19.837          |
| SWS10             | 66                               | 16              | 12              | 0               | 1               | 95    | 33.601                              | 9.603           | 4.648           | 0.00            | 16.754          | 64.606 | 0.509                                        | 0.600           | 0.387           | -               | 16.754          |
| SWS11             | 142                              | 71              | 49              | 17              | 1               | 280   | 74.729                              | 40.181          | 30.231          | 9.116           | 1.633           | 155.89 | 0.526                                        | 0.566           | 0.617           | 0.536           | 1.633           |
| SWS12             | 73                               | 34              | 17              | 3               | 1               | 128   | 33.339                              | 20.062          | 9.491           | 8.487           | 2.693           | 74.072 | 0.457                                        | 0.590           | 0.558           | 2.829           | 2.693           |

**Table S10.** Stream length and bifurcation ratio values of sub-watersheds for the Nandhour-Kailash River watershed.

2

| Sub watersheds | Stream length ratio ( $R_L$ ) = $L_u/L_{u-1}$ |           |           |           |       | Bifurcation ratio ( $R_B$ ) = $N_u/N_{u-1}$ |           |           |           |       |
|----------------|-----------------------------------------------|-----------|-----------|-----------|-------|---------------------------------------------|-----------|-----------|-----------|-------|
|                | $L_2/L_1$                                     | $L_3/L_2$ | $L_4/L_3$ | $L_5/L_4$ | $R_L$ | $N_1/N_2$                                   | $N_2/N_3$ | $N_3/N_4$ | $N_4/N_5$ | $R_B$ |
| SWS1           | 0.366                                         | 1.218     | 0.269     | 0.508     | 0.511 | 2.765                                       | 0.850     | 3.333     | 6.00      | 2.396 |
| SWS2           | 0.522                                         | 0.376     | 1.162     | -         | 0.475 | 1.941                                       | 2.429     | 14.00     | -         | 2.171 |
| SWS3           | 0.312                                         | 0.963     | 1.063     | -         | 0.523 | 2.591                                       | 1.692     | 13.00     | -         | 3.544 |
| SWS4           | 0.339                                         | 0.709     | 0.395     | 1.708     | 0.612 | 2.324                                       | 1.069     | 3.286     | 7.00      | 2.878 |
| SWS5           | 0.357                                         | 0.788     | 0.321     | 1.484     | 0.583 | 2.269                                       | 2.00      | 1.083     | 12.00     | 2.441 |
| SWS6           | 0.464                                         | 0.255     | -         | -         | 0.575 | 2.00                                        | 4.833     | -         | -         | 2.856 |
| SWS7           | 0.933                                         | 0.303     | 0.253     | 3.230     | 0.402 | 2.00                                        | 2.90      | 2.00      | 5.00      | 2.685 |
| SWS8           | 0.265                                         | 0.710     | -         | -         | 0.799 | 3.750                                       | 0.727     | -         | -         | 2.633 |
| SWS9           | 0.753                                         | 0.195     | -         | -         | 0.700 | 1.933                                       | 5.00      | -         | -         | 2.864 |
| SWS10          | 0.286                                         | 0.484     | -         | -         | 0.695 | 4.125                                       | 1.333     | -         | -         | 3.050 |
| SWS11          | 0.538                                         | 0.752     | 0.302     | 0.179     | 0.401 | 2.00                                        | 1.449     | 2.882     | 2.882     | 3.108 |
| SWS12          | 0.602                                         | 0.473     | 0.894     | 0.317     | 0.554 | 2.147                                       | 2.147     | 5.667     | 3.00      | 3.006 |

3

**Table S11.** Different Areal aspects of the Nandhour-Kailash River watershed.

| S. No. | Parameter                                               | Software/formula                          | Value   |
|--------|---------------------------------------------------------|-------------------------------------------|---------|
| 1      | Basin area (A, Km <sup>2</sup> )                        | ArcGIS v10.4.1                            | 474.094 |
| 2      | Basin perimeter (P, Km)                                 | ArcGIS v10.4.1                            | 276.207 |
| 3      | Drainage density (D <sub>d</sub> , Km/Km <sup>2</sup> ) | $D_d = \frac{L_u}{A}$                     | 1.757   |
| 4      | Stream frequency (F <sub>s</sub> , Km <sup>-2</sup> )   | $F_s = \frac{N_u}{A}$                     | 3.123   |
| 5      | Drainage texture (T, Km <sup>-1</sup> )                 | T= D <sub>d</sub> x F <sub>s</sub>        | 5.489   |
| 6      | Length of overland flow (L <sub>g</sub> , Km)           | $L_g = \frac{1}{2D_d}$                    | 0.878   |
| 7      | Elongation ratio (R <sub>e</sub> )                      | $R_e = \frac{1.128\sqrt{A}}{L}$           | 0.565   |
| 8      | Circulatory ratio (R <sub>c</sub> )                     | $R_c = 4\pi \left( \frac{A}{P^2} \right)$ | 0.078   |
| 9      | Form factor (F <sub>f</sub> )                           | $F_f = \frac{A}{L^2}$                     | 0.251   |
| 10     | Compactness coefficient (C <sub>c</sub> )               | $C_c = 0.2821 \frac{P}{A^{0.5}}$          | 3.578   |
| 11     | Shape factor (S <sub>f</sub> )                          | $S_f = \frac{L^2}{A}$                     | 3.979   |

**Table S12.** Hydrological area aspects of Nandhour-Kailash River sub-watershed.

| Sub watersheds | Drainage density | Stream frequency | Drainage texture | Elongation ratio | Length of overland flow |
|----------------|------------------|------------------|------------------|------------------|-------------------------|
| SWS1           | 1.51             | 3.12             | 4.72             | 0.68             | 0.33                    |
| SWS2           | 1.44             | 3.12             | 4.51             | 0.67             | 0.34                    |
| SWS3           | 1.59             | 2.98             | 4.76             | 0.68             | 0.31                    |
| SWS4           | 1.59             | 2.82             | 4.49             | 0.65             | 0.31                    |
| SWS5           | 1.65             | 3.10             | 5.15             | 0.67             | 0.30                    |

|       |      |      |      |      |      |
|-------|------|------|------|------|------|
| SWS6  | 1.57 | 2.45 | 3.86 | 0.66 | 0.32 |
| SWS7  | 1.62 | 3.10 | 5.05 | 0.67 | 0.30 |
| SWS8  | 1.89 | 2.83 | 5.37 | 0.68 | 0.26 |
| SWS9  | 2.14 | 2.90 | 6.22 | 0.67 | 0.23 |
| SWS10 | 1.99 | 2.93 | 5.87 | 0.66 | 0.25 |
| SWS11 | 2.04 | 3.68 | 7.54 | 0.64 | 0.24 |
| SWS12 | 1.83 | 3.16 | 5.80 | 0.66 | 0.27 |

**Table S13.** Physical areal aspects of Nandhour-Kailash River sub-watershed.

| Sub watersheds | Circulatory ratio | Form factor | Compactness coefficient | Shape factor |
|----------------|-------------------|-------------|-------------------------|--------------|
| SWS1           | 0.37              | 0.360       | 1.623                   | 2.722        |
| SWS2           | 0.26              | 0.355       | 1.927                   | 2.810        |
| SWS3           | 0.21              | 0.363       | 2.147                   | 2.747        |
| SWS4           | 0.24              | 0.337       | 2.018                   | 2.964        |
| SWS5           | 0.31              | 0.357       | 1.773                   | 2.799        |
| SWS6           | 0.32              | 0.353       | 1.774                   | 2.826        |
| SWS7           | 0.20              | 0.360       | 2.214                   | 2.770        |
| SWS8           | 0.16              | 0.358       | 2.491                   | 2.785        |
| SWS9           | 0.09              | 0.361       | 3.234                   | 2.765        |
| SWS10          | 0.10              | 0.362       | 3.014                   | 2.761        |
| SWS11          | 0.09              | 0.322       | 3.227                   | 3.102        |
| SWS12          | 0.18              | 0.351       | 2.312                   | 2.846        |

**Table S14.** Different relief aspects of the Nandhour-Kailash River watershed.

| Aspects | Software/formula | Value |
|---------|------------------|-------|
|---------|------------------|-------|

|                                     |                                                                                                                |       |
|-------------------------------------|----------------------------------------------------------------------------------------------------------------|-------|
| Maximum elevation (H, km)           | GIS software analysis                                                                                          | 2.084 |
| Minimum elevation (h, km)           | GIS software analysis                                                                                          | 0.132 |
| Basin relief (km)                   | H-h                                                                                                            | 1.951 |
| Relative relief (R <sub>r</sub> )   | $\frac{H - h}{P} \times 100$                                                                                   | 0.706 |
| Relief ratio                        | $\frac{H - h}{L}$                                                                                              | 0.044 |
| Ruggedness number (R <sub>n</sub> ) | (H-h) × D <sub>d</sub>                                                                                         | 3.428 |
| Hypsometric integral (HI)           | $\frac{\text{Mean elevation} - \text{Minimum elevation}}{\text{Maximum elevation} - \text{Minimum elevation}}$ | 0.481 |
